# Supplementary material for: Measuring collective cell movement and extracellular matrix interactions using magnetic resonance imaging
Source: PubMed Central journal article supplement — Sci Rep. 2013 May 23;3:1879. doi: 10.1038/srep01879 (PMC3662010; doi:10.1038/srep01879), 2013-05-23
Supplement: srep01879-s1.pdf [file srep01879-s1.pdf]

# Measuring collective cell movement and extracellular matrix interactions using magnetic resonance imaging

Yun Chen, Stephen J. Dodd, Michael A. Tangrea, Michael R. Emmert-Buck, Alan P. Koretsky

## Movie Legends

Movie S1. MDCK cell clusters migrated in a thin 3D collagen gel.

Movie S2. MRI timelapse images of a ring-shaped collagen gel embedded with MDCK cells.

Movie S3. Segmented timelapse images of MDCK cell clusters deforming the 3D ECM.

Movie S4. Stress field of MDCK cell-embedded collagen gel evaluated by its deformation.

Movie S5. Force generation by a single cluster of MDCK cells caused displacement of embedded fiduciary beads in a 3D collagen gel.

Movie S6. MRI timelapsed images of arbitrarily shaped collagen gel embedded with MEF cells.

Movie S7. Stress field of MEFs-embedded collagen gel evaluated by its deformation.

Movie S8: Force generation by a single cluster (indicated by yellow arrow) of NBT-2 cells caused displacement of embedded fiduciary beads in a 3D collagen gel.

Movie S9: Stress field generated by a single cluster (indicated by yellow arrow) of NBT-2 cells.
